# Supplementary material for: Construction of a chromosome-assigned, sequence-tagged linkage map for the radish, Raphanus sativus L. and QTL analysis of morphological traits
Source: PubMed Central journal article supplement — Breed Sci. 2013 Jun 1;63(2):218–26. doi: 10.1270/jsbbs.63.218 (PMC3688384; doi:10.1270/jsbbs.63.218), 2013-06-01
Supplement: 63_218_1.pdf [file 63_218_1.pdf]

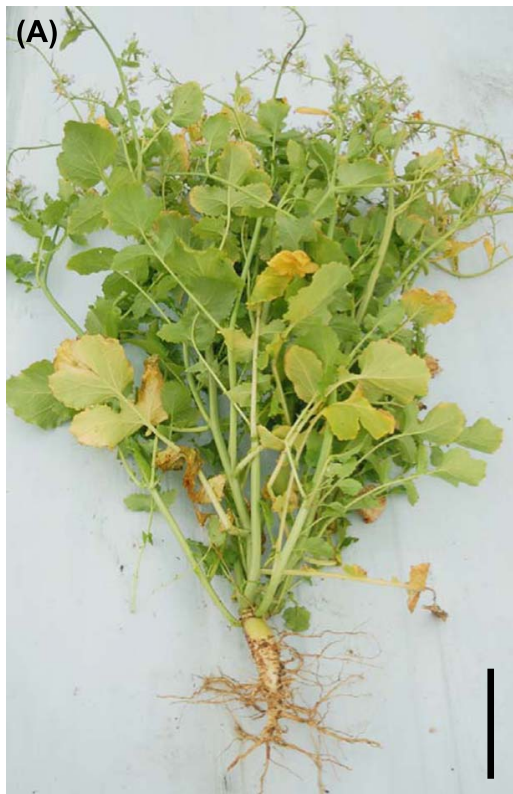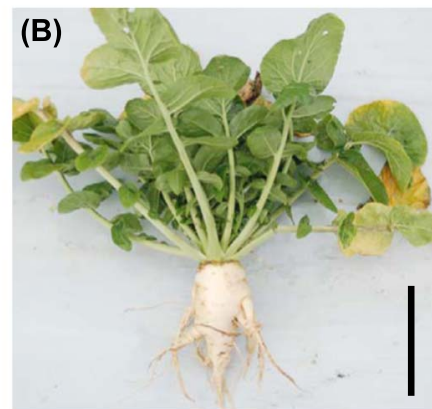

**Supplemental Fig. 1.** Morphologies of a rat-tailed radish (A) and the 'Harufuku' inbred line Haru-S (B) at harvest (three months after sowing). Only a single individual is shown as a representative for each line. Note that this rat-tailed radish is a commercial cultivar (Chia Tai Co. Ltd., Bangkok, Thailand) because of the severe inbred depression of the parental line Saya-S (see Materials and Methods). Scale bar = 10 cm.

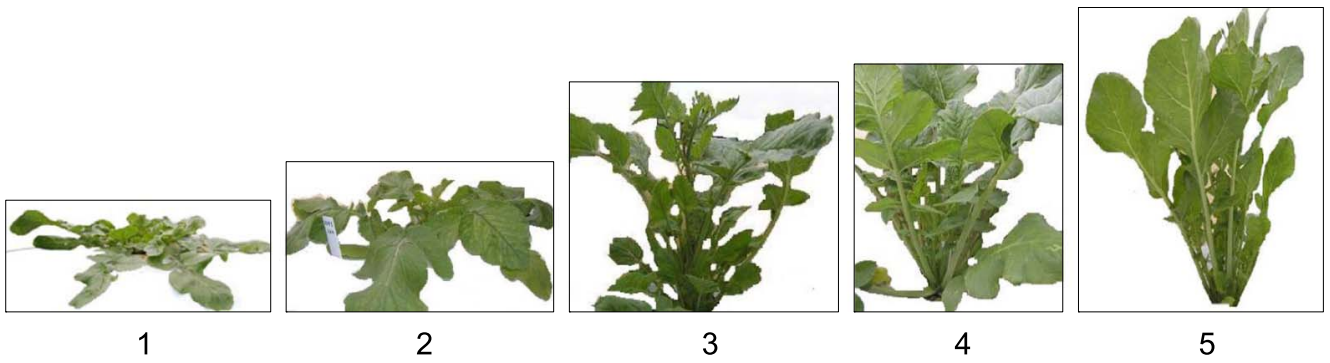

**Supplemental Fig. 2.** Categories of plant shape (*PS*) in  $F_5$  recombinant inbred lines (RILs). Only representative individuals in RILs are shown, which were classified into one of five categories based on visual inspection (1 = prostrate, 2 = semi-prostrate, 3 = intermediate, 4 = open and 5 = erect).

> RS1CL7063Contig1

GGACAAGTTTATACTTTAAGTGCTCTCTCTCTCTACGTACCAAACAAA  
TAATCAGTCTAGAGATGGAAGGCAAACTGTGATTTTAAGTGTGCTCATA  
ATGAGTCTTGTCATGGCGCAGAATCAAGTCGAAGGAAAGAGTTGTTGCC  
CGGACACCACTGCCAGAAACGCATATAATATATGCCGTCTTACTGGATCC  
TCTAGGAAAACCTTGTGCAAAAATCAGTGGATGCATCGTTTCTAGGACCGAG  
ACATGTCCTCAGGGATATCCATATGACATTCTCGAAAACCTCTGGTGATGCTGT  
CAATGAATACTGCAAGTTGGGGTGTGCATCCTCTGTGTGTGGTGCCTTAACCA  
TTCTCCAGAACTCCGATGCAAGTGAACTGTGAATGGAGCGGTTGCACAATG  
CACCAAGGCATGTTCTAATTTCTGCAGCAAGGACTCGGCTAATGCAGTTGAA  
ACTGCTTAAAAAGCATATCCACTATCTATGTGTTGCGTGTGTTGTTCTCTCT  
CGTTTTCAATAATTATCGTGTATGTGGCAAAATGACTCTTGTGTTATTTCTCTGG  
TTTTCTATGTAACGTAGAAGGTCATCGATCCCTAGATTGTTTTTCCCTTCTACT  
TGCTATATCTAAATAAAGAGTAATGTTTCATTC

> RS2CL1232Contig1

GGTCAAAAAGTAATGTTCTTATATGCATAATTTCTTATAACCAGAAAATATCA  
TTTGACTACATGATCCAAACAAAAACAATTTTCTAACAAAAAAAGTTATT  
GTAAAGAAGAACTAACTATATTTTATAACTTTTGCTTAAGTAGAACTCACTTA  
ACACCCTTATCTTTAATTGGATGCTAGCCTGGTAAGCATCTCCAAAAACCTA  
ATTTATTTCTAATGAGAGACTCCACTAGCTTATTTCTTCCCTCATTGTTTTT  
ATTTTTAATCTTTTACTGTGGAGAATCTTCCACTCTGGCTAATGATATCTA  
TAGCAAACCTGCAAAGGTATTTTCGATCATTGTTATGAGAAAATCATTCTCC  
TTTTTCACGGGAGATATCTGTTGATTGTGCGCCGTTGAATTTTCATTCCGCA  
AAATATCGGTGCATCCTCTGCATCATAAAAAATTATTTTTAGCCTTTTCGAA  
ATTCCGCACCTTGCAGTGATTCAAACCTGAACTTAACGATTTAAAGCTCT  
TGGAGTAAAGTTTAAGGCAATCTTCCAAAAGCTTCTTACTAAGATTACTC  
TTATATTTCTTCTCTTTTATAATATTCTCCACAATTCCTTCTCACGTTTCGTTA  
AGTTAGATATGGCATTATTCACTCCCACCATGGTCAGTTCTTCGAGATTTCT  
TCACTTTCTGGCTCTCTGGATTCTCTCTGAGAGATGCAATGCAATCCTTTTCG  
AAATGTGGCTCGTTTTCTTACCTAGAACTCTGCAGCTTTCTTGCAAGATT  
TTGAATCAGAGAATCTGCCACTTTGTTGGCTGTGCAACTATTGAAGAGAAAC  
GCAAAAAATATGAGGTACATCTTCACTGTGTTTTTTTTGAAACATCTTCTTTGC  
TGTGTCCC

> RS2CL1263Contig1

**Supplemental Fig. 3.** Nucleotide sequences of markers designed from radish cDNA contig data, which were retrieved from the RadishDatabase (<http://radish.plantbiology.msu.edu/index.php/Sequences:All>). Forward and reverse primers for each marker are underlined and the predicted amplified regions are indicated with bold-face types.

GGATCAAGCCTCTGGCAAGAAGTCAAAGGGGAACTTGAAAAGAAAGGGCG  
ACAAGGCGCCTTCTGGTTCAGGGAACGATGCTGTATCTCAAAGTGACGAAAG  
TGTCACAGCTGGTTCATCTGATGAAAATGCAAACCACCAGGAACAAGGTTCA  
GTTAGGAAGCCAAGCTTCGGACAGATGCTGGCTGATGCAAGTTCTCAGAGTA  
ATACTACTGGTGAGATCCAAGGTTCCATGCCATGAAGCCAGTGGCCCCG  
**GTGACTAATCTGAATATGGGGATGGACTTATGGTCTTCCCAGGCTGGCG**  
**TAGCTGTTAAGGATGAAAGAGAGCTCAAGAGGCAGAAAAGGAAACAAT**  
**CTAACCGTGAATCCGCTAGGCGGTCCAGATTGCGCAAGCAGGCGGAAT**  
**GCGAGCAGCTTCAACAGAGAGTAGAGAGTTTGACGAGTGAGAATCAA**  
**CCCTGAGAGATGAGTTACAGAGACTATCCGGAGAATGTGAGAAGCTCAA**  
**GACTGAGAACAACCTATTTCAGGATGAGTTGGTGAGATTGCATGGGCCA**  
**GAGGCCGTAGCTAATCTAGAGCAGAATGCTGCCGGGTCTAAAGATGCTG**  
AATGAACACATTAACACTTAGGGGAAACATGGAGCTTTATAACCGTATTGTTG  
GGATAAAAACTTATTTGAGATTTACGTGACAAAAATACAATCTGTGTTTTG  
ACAATTCATTGTAATAGTGATTCAACATAAGGCTGTAAAAGCTGCAAAGCTA  
TGATGACTACACTTCTTGTTG

> RS2CL2285Contig1

AGGGATCTCACTGTCTCACAACACTGATGAAGCTGCTTCCTCTACGACCGAT  
GCAGTTGCTAACGACCCGCTCTCTTGTTTTGTGAACACAATAGCTTCTTGTTG  
TAGTGATTTAGAAAAGAAGATTGATGCTCGTGAAGGCTGCTGCCGCGAGGAG  
TGTTCTTCAGGGGAGTTTGATTACTTCGAGGCAATGACTCTGAGCTTAC  
CTCTAACCAAAGAAGAAGACTACATGCCAACGCCTCTAGTCCCTGAACA  
TCTGAAATTCGACGGGACGGATACTGTGGGAACCACGGTTAACAGGCCA  
AGGAGAGGACAAGCAAGACGAGGGAGACCAAGAAGGGATTTCCAAAGG  
GATGTTCTCCCTGGACTTGCTTCTCTGTCTAGGCTAGAAGTAACAGAAG  
ATCTTCAAATGTTTGAGGGACTTATGAAAGCCACAGGCTACAACCTGGAA  
CTCAGGAGTGGCTAGAAGAAGCTCAAACCGAGGTGGGTCTAGCCGTGG  
AAGGAAACGACTGGTCAGCAACGTTGGCAGAGCTCCTGTTTGTCTTCT  
TTGGAGCAGACAATAGATAACAACAATGATGTACAAATGGTGGGGGGAC  
TTGAAGATAGGAGCCTTACAGGGTGGGGAAACGCAACTAGAAGACCAA  
GGAGACAAAGATGCCCTGCAGGTACTCCCCAACTGTTGTCTTAACATAAAG  
TTTTATAGAGGGAGAACAACAAAAAACAAGAGAACTGATTCAACAATGAA  
GAAAACAAACAGATGTTTTATTATTCTCAATCATCCCATGTTTGTGGGTATTG  
GTTGCCCTTTGTATATCTTGTCTCTTTACAAGGGCTAAAGAAAAAAGAAT  
TACATGATTGTGTTATATATTAGACTGGTTGGTTATTAC

Supplemental Fig. 3. (continued)

> RS2CL3325Contig1

TTTTTTCAGACAGTTTTTTCAGATCTGTCGGAAGAACAGACTACTTGACATTAC  
GGAATGGATTCATTGCTGTTTCATCTAGCTCCAGGGAGTCAATTCAACTTCC  
AGAAGTATATTTAAAAGATCCTTAGAGGATGATTTCAAGCTGGTCGTCGGA  
GTCAGCCCTGTCTATGGGCATCTTTTGTCTTTTCTTCTCTAAATGT  
TGAAGGCTTCAAGATCTTGTACATTGGATCTGCACTGCCGTTATTATAA  
TCTTAGCTGTGGGAACAAAGCTACAAGCAATCATGACAAGGATGGCTCT  
TGGGATCACTGATAAACACGCAGTGGTTCAAGGAATGCCACTTGTACAA  
GGCAACGATGAGTACTTCTGGTTCGTCGTCCCCAGTTGATTCTCCATC  
TCATCCATTTTCGCCTTGTTTCAGAACGCGTTTCAGATCACATACTTCTTT  
TGGATATGGTATTCCTTTGGGAAAACTCTTGCTACCATCCTGACTTCAA  
GATTGCCCTTGTAAGGTGGCCATAGCTCTTGGAGTGTTATGCCCTTTGC  
AGCTACATCACACTCCCTCTTTACGCACTCGTTACTCAGATGGGTTCAAG  
GATGAAGAAATCTGTATTCGACGAACAAACATCAAAGGCACTTAAGAAATGG  
AGAATGGCTGTGAAGAAGAAGAAAGGCGGAAAGCTAGCACCACCAAGAG  
GCTAGGTGGAGATGGAAGCGTGAGCCCTACGGCATCATCAACTGTTAGGTCT  
TCTCTGTCCGTTAGGTCATTGCAGCGCTATAAAACCACAGGGCATTTCGATGAG  
ATACGAAGGACTTGACCCTGAGACATCGGATCTCGACACGGACAACGAAGC  
GGCTTTGACACCCGGATGTCTCCAGCCGCCGTGCAACGGCTCCAGGCATT  
GAGCTTGCTGCGGTGAAGGTTGAACAAGATAAACTAGAGACCAAGACCGGT  
GAGACTAGCCGTGACGGTGAAAATCATTCTAAGGAGTTCTCCTTTGTCAAGC  
CTGCGCCGCCTAAAGAACCATCGCAAGACAGGTGAGACCAGACGTGTGATG  
ATAATGTTTCCATATAGTTCTAGTCTCTGCCAAAAGGCTCTGTTGAGCAGTAA  
AGAGTGGATTACTCAGGATATTTATTTTCTGGGTTATTTATCTATATACTTTG  
TAAATCAATGCCGTGTTGAAAAAGTAAAGTATTGACGACCATATTTATTAGGG  
TT

> RS2CL3416Contig1

AACTGAAAGAGGACTGCTACTGTGCATATGTAGCCTCTTATTATTTGAGTTATTC  
GTTATTATCTGATGATGAGTGATGGATCATCAAAGTTATACAAATATTGTAAAA  
CAAAGTAAAGAACCTTGTAATCATTTTAAGGTTGTAAAATCTTGAGATGTGAA  
GATAAACCTCAAACAGACAAGCTTATATTTTTTTTTCTTTTAATTTTAGGCTTAT  
ATGTACAAAATACCAAAGAAGAGACCCTTATGCCTTAAACACTGGTTCAAT  
GAGCCGGGTGAGGGTAAGCTGTGTGGGTGCGGTGGGTCTGGAGGATAC  
ATGCACAGTGAACCGATGTTAAATTCAGACAACCACTCATGACAAGCGA

Supplemental Fig.3. (continued)

ATGCCTGCCGGAACAAGTGTGGAGCGCAGGGAATGTATCGCAAACAGC  
TTGAACAGCTGAAGGTGTAAGGTAAGTACATTGGCTAATGTTGAGGCTT  
CTTAGTCCTTCTTCATCGAACTTGCCTTTCTTAACCGACCGCCTCATATC  
GTGCTTGTTCCTCACTCCACTCTGAGCCAGTGAGTACATTGCTCTGTCA  
GTTATGTTCCCTGCAATAGTATAGCCCCAATGACCTCAAGTGTACACACTT  
ATTCGCCAAAGCCACCACACTCTCATCTGTAATAAGAACACATCCACAAA  
GATCAAGGGTTCTTAGATCAGGACAGCCATAAGATAAACTCATGACTCCAT  
CATCACTTACATTCTCACACCATCCCAAGTTTAGTGATTGCATCTGACTGCAG  
TTTTCTCCAATAGCCTGCAATGCATTGTGATACAGCTTCAACACAGCCACA  
AAGATTTAGAACTTTGC

> RS2CL6006Contig1

GGACAAACCATTTTACTAGCCTCTCCACATCTACAAAGGTTCAACAAGTCACA  
AATACAAAGGAAGTCATGAAGAACATACTATCATGCATGGTAACCATCATCAC  
CCTCTCCATCCTTACAACCCATGCTCAAGGAAGAAAGGTATCACAGTCATATG  
AAACATTCGAATACACAGCCATCACTTGCAGATCCCACAGCGCCTCCATA  
ACAGACTTCGGTGCTGTTCGGAGACGGCAAAACATTGAACACAAAAGCA  
TTCCAGAGCGCCGTAGATCATCTCAGCCAATACTCATCCGACGGTGGAG  
CTCAGCTCTTGTCCCCGCCGGGAAATGGCTCACCGGAAGTTTCAGCCTC  
ACAAGCCATTTCACTCTGTTCCCTCACAAAGACGCTACTCTTCTCGCTG  
CTCAAGACTTAGAAGAATACCCAATTCTAAAAGCTTTGCCTTCTTACGGA  
AGAGGCCGTGATGCCGCCGGTGAAGATTCGCTAGTCTTGTCTTCGGG  
ACTAATCTCTCCGACGTTATCATAACCGGAAACAATGGTACGATCGATGG  
TCAGGGATCGTTTTTGGTGGCAGAAGTTTCACGGTGGTAAACTTAAATAC  
ACACGGCCGTACCTGATTGAGTTAATGTTCTCCGACACTATCCAGATATC  
GAACATAACGCTCATTGATTCTCCGTCTGGAATATTCACCCGGTGTACA  
GTAGCAGCATCATCGTGAAAGGTGTCACGATCATCGCCCCGGTGAAATCTCC  
GAACACCGACGGAATCAACCCAGACTCGTGCACGAACACCAGGATCGAAGA  
CTGCTACATAATCTCCGGCGACGACTGCGTCGCCGTGAAAAGCGGATGGGAC  
GAGTGGTGTGATCCTAAGCCGTGCGTTTTGCTTGATGGGGGAGGTGATTCC  
GAGAAGAAGAAGAGGATGGACAACGGTGGTGGGTGTGAGTTTCCGAGTGAT  
GTGTTGGAGATTGATAGTGTGAGCTTAAGAGTTGTAGCTATCAGATGAGTTA  
GAGAGTGTGTGTCATCTTTTTTTTTTTTAAAGACCTAGTTTC

Supplemental Fig.3. (continued)

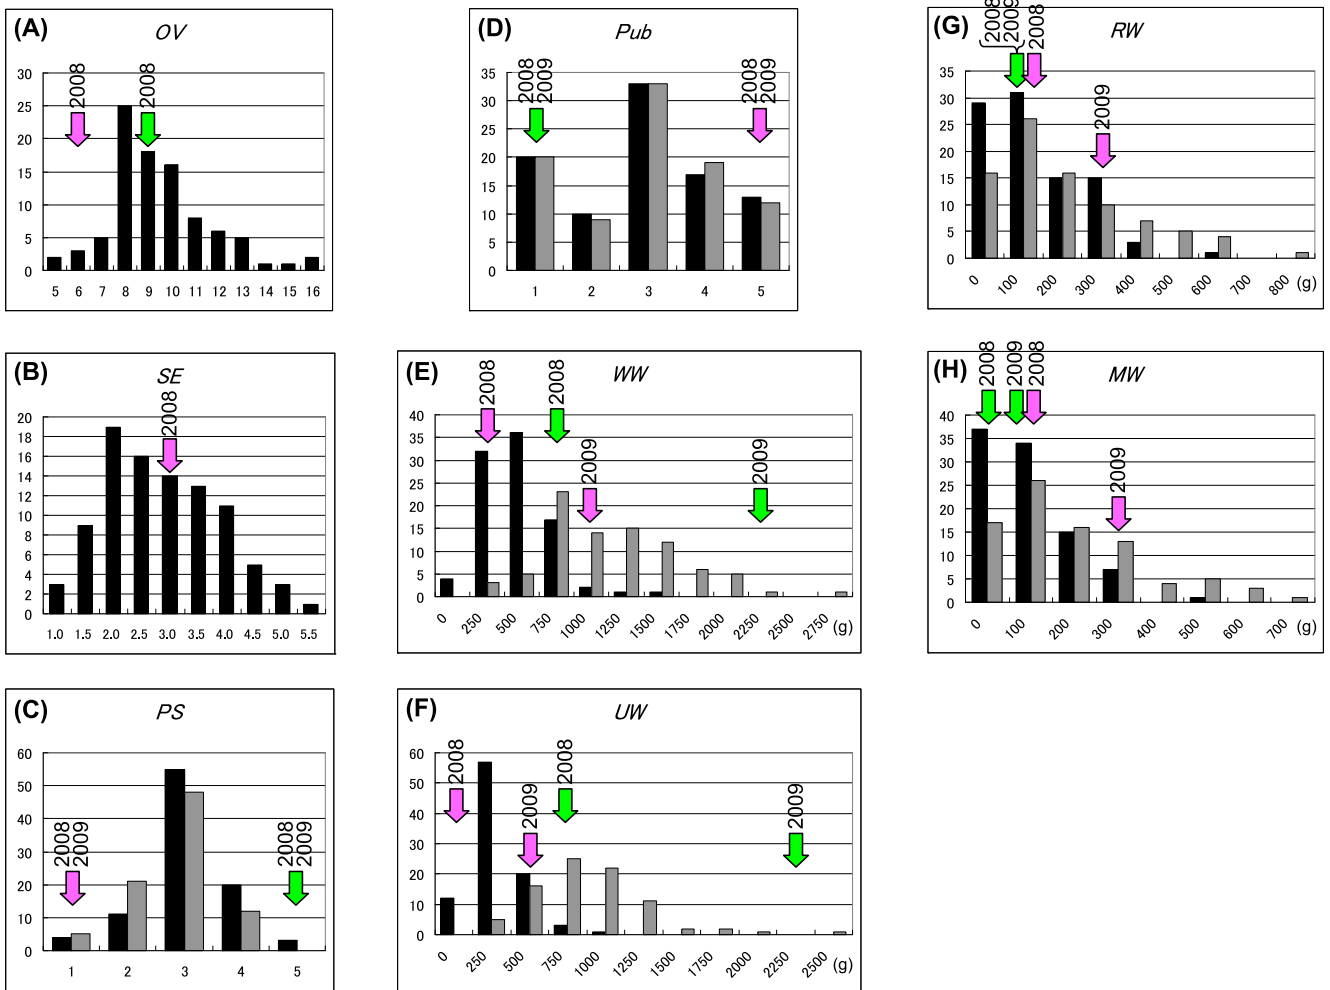

**Supplemental Fig. 4.** Frequency distributions of traits in the RIL population. The trait names (*OV-MW*) (A–H) are shown on the top of each graph. Black and gray bars represent the data of RILs in 2008 and 2009, respectively. Green and pink arrows indicate values of the parental lines (rat-tail radish and Haru-S) in the two years, respectively.

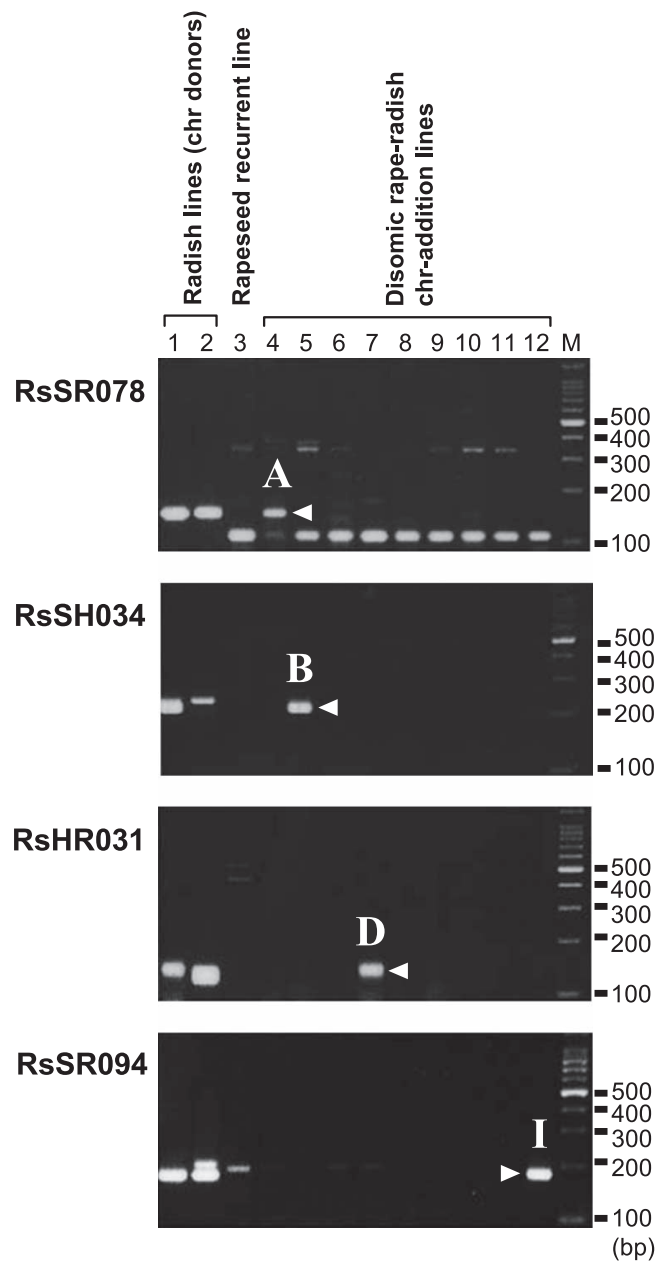

**Supplemental Fig. 5.** Assignment of radish linkage groups to the corresponding chromosomes, using the complete set of disomic rape-radish chromosome-addition lines (Budahn *et al.* 2008) and the radish sequence-tagged markers. Only examples of four SSR markers are shown, whose names are indicated on the left. Lanes 1 and 2: oil radish strain 2655 and fodder radish strain 101/177, used as donors of radish chromosomes to the disomic addition lines. Lane 3: rapeseed variety ‘Madora’ used as recurrent line in successive backcrosses. Lanes 4–12: disomic addition lines, each of which has one of the nine radish chromosome pairs AA-II (from left to right) in the *B. napus* background. Lane M: molecular weight standards (100 bp ladder), whose sizes ( $\leq 500$  bp) are indicated on the right. Radish-specific bands in the disomic addition lines are indicated with arrowheads and the assigned chromosomes are denoted with letters on the bands.
